# Supplementary material for: The rotational spectrum of chlorine trifluoride, ClF3. Centrifugal distortion analysis, Cl nuclear magnetic shielding tensor, structure, and the harmonic force field
Source: Royal Society of Chemistry journal article supplement (doi:10.1039/b100527h), 2001-01-01
Supplement: clf3_fit.pdf [file clf3_fit.pdf]

ClF3 Mon Jan 08 14:56:38 2001

LINES REQUESTED = 329 NUMBER OF PARAMETERS = 38 NUMBER OF ITERATIONS = 3

|    | parameters | value      | a priori error        |               |            |
|----|------------|------------|-----------------------|---------------|------------|
| 1  | 1          | 10000      | 1.3748294310800E+004  | 1.000000E+017 | A(35)      |
| 2  | 2          | 20000      | 4.6117541979199E+003  | 1.000000E+017 | B(35)      |
| 3  | 3          | 30000      | 3.4486003973167E+003  | 1.000000E+017 | C(35)      |
| 4  | 4          | 10011      | 1.3653579069105E+004  | 1.000000E+017 | A(37)      |
| 5  | 5          | 20011      | 4.6119032315170E+003  | 1.000000E+017 | B(37)      |
| 6  | 6          | 30011      | 3.4426914142594E+003  | 1.000000E+017 | C(37)      |
| 7  | 7          | 200        | -1.0865008168231E-003 | 1.000000E+017 | -DelJ(35)  |
| 8  | 8          | 211        | -1.0826351371325E-003 | 1.000000E+017 | -DelJ(37)  |
| 9  | 9          | 1100       | -9.9686638837852E-003 | 1.000000E+017 | -DelJK(35) |
| 10 | 10         | 1111       | -9.8188601867477E-003 | 1.000000E+017 | -DelJK(37) |
| 11 | 11         | 2000       | -2.4211926656506E-002 | 1.000000E+017 | -DelK(35)  |
| 12 | 12         | 2011       | -2.3011691730111E-002 | 1.000000E+017 | -DelK(37)  |
| 13 | 13         | 40100      | -2.3150080709616E-004 | 1.000000E+017 | -delJ(35)  |
| 14 | 14         | 40111      | -2.3336169626160E-004 | 1.000000E+017 | -delJ(37)  |
| 15 | 15         | 41000      | -5.6874420348454E-003 | 1.000000E+018 | -delK(35)  |
| 16 | 16         | 41011      | -5.6611187754337E-003 | 1.000000E+018 | -delK(37)  |
| 17 | 17         | 399        | 9.0817688306982E-011  | 1.000000E+017 | PhiJ(all)  |
| 18 | 18         | 1299       | 1.3273152562644E-008  | 1.000000E+017 | PhiJK(all) |
| 19 | 19         | 2199       | -1.0865272370693E-007 | 1.000000E+017 | PhiKJ(all) |
| 20 | 20         | 3000       | 9.7557974779053E-008  | 1.000000E+017 | PhiK(35)   |
| 21 | 20         | -3011      | 9.0410035419730E-008  | 0.926731      | PhiK(37)   |
| 22 | 21         | 40299      | -3.3257430945416E-011 | 1.000000E+017 | phiJ(all)  |
| 23 | 22         | 41199      | 1.0018553240159E-008  | 1.000000E+017 | phiJK(all) |
| 24 | 23         | 42099      | 1.2921378474638E-007  | 1.000000E+017 | phiK(all)  |
| 25 | 24         | 110010000  | -8.2028139476667E+001 | 1.000000E+017 | Xaa(35)    |
| 26 | 24         | -110030000 | 8.2028139476667E+001  | -1.000000     | Xcc(35)    |
| 27 | 25         | 110020000  | -6.5359003551508E+001 | 1.000000E+017 | Xbb(35)    |
| 28 | 25         | -110030000 | 6.5359003551508E+001  | -1.000000     | Xcc(35)    |
| 29 | 26         | 110010011  | -6.4646413743908E+001 | 1.000000E+017 | Xaa(37)    |
| 30 | 26         | -110030011 | 6.4646413743908E+001  | -1.000000     | Xcc(37)    |
| 31 | 27         | 110020011  | -5.1526440018821E+001 | 1.000000E+017 | Xbb(37)    |
| 32 | 27         | -110030011 | 5.1526440018821E+001  | -1.000000     | Xcc(37)    |
| 33 | 28         | 10010000   | 1.8027881469156E-002  | 1.000000E+017 | Caa(35)    |
| 34 | 28         | -10010011  | 1.5006818973526E-002  | 0.832423      | Caa(37)    |
| 35 | 29         | 10020000   | 3.3161292740912E-003  | 1.000000E+017 | Cbb(35)    |
| 36 | 29         | -10020011  | 2.7604215056682E-003  | 0.832423      | Cbb(37)    |
| 37 | 30         | 10030000   | 1.9832297221531E-003  | 1.000000E+017 | Ccc(35)    |
| 38 | 30         | -10030011  | 1.6508855726718E-003  | 0.832423      | Ccc(37)    |

38 parameters read, 30 independent parameters

ENERGY SORT OF WANG SUB-BLOCKS

PROLATE ROTOR

V KMIN KMAX ESYMWT SPINS

|   |   |    |    |     |
|---|---|----|----|-----|
| 0 | 0 | 60 | -1 | 1.5 |
| 1 | 0 | 60 | -1 | 1.5 |

Maximum Dimension for Hamiltonian = 124

- I: Isotopomer; 0 is (35)ClF3, 1 is (37)ClF3
- F is rounded (up) to the nearest integer
- avg o-c is the intensity weighted average of the observed minus calculated frequencies if two or more lines overlap
- frequencies, uncertainties, and values of parameters are given in units of megahertz

|     | J" | Ka"Kc" | I | F" | J' | Ka'Kc' | I | F' | exp.freq. | exp.unc. | obs-calc | avg o-c  | weight |
|-----|----|--------|---|----|----|--------|---|----|-----------|----------|----------|----------|--------|
| 1:  | 2  | 0      | 2 | 0  | 3  | 1      | 1 | 0  | 3         | 6859.947 | 0.015    | 0.00650  |        |
| 2:  | 2  | 0      | 2 | 0  | 2  | 1      | 1 | 0  | 1         | 6863.782 | 0.013    | 0.00635  |        |
| 3:  | 2  | 0      | 2 | 0  | 3  | 1      | 1 | 0  | 2         | 6876.331 | 0.019    | 0.01116  |        |
| 4:  | 2  | 0      | 2 | 0  | 4  | 1      | 1 | 0  | 3         | 6883.525 | 0.017    | 0.01109  |        |
| 5:  | 2  | 0      | 2 | 0  | 1  | 1      | 1 | 0  | 1         | 6887.322 | 0.016    | 0.00627  |        |
| 6:  | 2  | 0      | 2 | 0  | 2  | 1      | 1 | 0  | 2         | 6893.172 | 0.021    | 0.00867  |        |
| 7:  | 2  | 0      | 2 | 0  | 1  | 1      | 1 | 0  | 2         | 6916.707 | 0.008    | 0.00359  |        |
| 8:  | 2  | 0      | 2 | 1  | 3  | 1      | 1 | 1  | 3         | 6945.428 | 0.014    | -0.00284 |        |
| 9:  | 2  | 0      | 2 | 1  | 3  | 1      | 1 | 1  | 2         | 6958.340 | 0.017    | -0.00233 |        |
| 10: | 2  | 0      | 2 | 1  | 4  | 1      | 1 | 1  | 3         | 6964.043 | 0.015    | -0.00089 |        |
| 11: | 2  | 0      | 2 | 1  | 1  | 1      | 1 | 1  | 1         | 6967.069 | 0.014    | 0.01054  |        |
| 12: | 2  | 0      | 2 | 1  | 2  | 1      | 1 | 1  | 2         | 6971.633 | 0.017    | -0.00485 |        |

|     |   |   |   |   |   |   |   |   |   |   |           |       |          |          |        |
|-----|---|---|---|---|---|---|---|---|---|---|-----------|-------|----------|----------|--------|
| 13: | 1 | 1 | 0 | 1 | 2 | 1 | 0 | 1 | 1 | 3 | 10230.832 | 0.010 | -0.00070 |          |        |
| 14: | 1 | 1 | 0 | 0 | 1 | 1 | 0 | 1 | 0 | 1 | 10242.282 | 0.005 | 0.00167  |          |        |
| 15: | 1 | 1 | 0 | 1 | 2 | 1 | 0 | 1 | 1 | 2 | 10247.000 | 0.010 | 0.00252  |          |        |
| 16: | 1 | 1 | 0 | 0 | 1 | 1 | 0 | 1 | 0 | 2 | 10279.189 | 0.009 | -0.00226 |          |        |
| 17: | 1 | 1 | 0 | 0 | 3 | 1 | 0 | 1 | 0 | 3 | 10288.183 | 0.003 | -0.00010 |          |        |
| 18: | 1 | 1 | 0 | 0 | 2 | 1 | 0 | 1 | 0 | 1 | 10308.665 | 0.100 | 0.05137  | 0.01018  | 0.4809 |
| 19: | 1 | 1 | 0 | 0 | 3 | 1 | 0 | 1 | 0 | 2 | 10308.665 | 0.100 | -0.02796 | 0.01018  | 0.5191 |
| 20: | 1 | 1 | 0 | 0 | 2 | 1 | 0 | 1 | 0 | 3 | 10325.016 | 0.008 | 0.00130  |          |        |
| 21: | 1 | 1 | 0 | 0 | 2 | 1 | 0 | 1 | 0 | 2 | 10345.530 | 0.010 | 0.00544  |          |        |
| 22: | 2 | 1 | 1 | 1 | 1 | 2 | 0 | 2 | 1 | 1 | 11454.733 | 0.012 | -0.00374 |          |        |
| 23: | 2 | 1 | 1 | 1 | 2 | 2 | 0 | 2 | 1 | 1 | 11467.618 | 0.029 | 0.00349  |          |        |
| 24: | 2 | 1 | 1 | 1 | 1 | 2 | 0 | 2 | 1 | 2 | 11473.303 | 0.142 | -0.02327 |          |        |
| 25: | 2 | 1 | 1 | 1 | 4 | 2 | 0 | 2 | 1 | 4 | 11477.198 | 0.006 | 0.00065  |          |        |
| 26: | 2 | 1 | 1 | 1 | 2 | 2 | 0 | 2 | 1 | 2 | 11486.210 | 0.005 | 0.00596  |          |        |
| 27: | 2 | 1 | 1 | 1 | 3 | 2 | 0 | 2 | 1 | 4 | 11490.081 | 0.013 | -0.00377 |          |        |
| 28: | 2 | 1 | 1 | 1 | 3 | 2 | 0 | 2 | 1 | 2 | 11495.406 | 0.004 | 0.00372  |          |        |
| 29: | 2 | 1 | 1 | 1 | 4 | 2 | 0 | 2 | 1 | 3 | 11495.817 | 0.021 | 0.00661  |          |        |
| 30: | 2 | 1 | 1 | 1 | 2 | 2 | 0 | 2 | 1 | 3 | 11499.501 | 0.006 | 0.00143  |          |        |
| 31: | 2 | 1 | 1 | 1 | 3 | 2 | 0 | 2 | 1 | 3 | 11508.696 | 0.010 | -0.00181 |          |        |
| 32: | 2 | 1 | 1 | 0 | 1 | 2 | 0 | 2 | 0 | 1 | 11527.025 | 0.015 | 0.01365  |          |        |
| 33: | 2 | 1 | 1 | 0 | 2 | 2 | 0 | 2 | 0 | 1 | 11543.343 | 0.010 | 0.00091  |          |        |
| 34: | 2 | 1 | 1 | 0 | 1 | 2 | 0 | 2 | 0 | 2 | 11550.550 | 0.013 | -0.00144 |          |        |
| 35: | 2 | 1 | 1 | 0 | 4 | 2 | 0 | 2 | 0 | 4 | 11555.460 | 0.005 | 0.00158  |          |        |
| 36: | 2 | 1 | 1 | 0 | 2 | 2 | 0 | 2 | 0 | 2 | 11566.884 | 0.006 | 0.00182  |          |        |
| 37: | 2 | 1 | 1 | 0 | 3 | 2 | 0 | 2 | 0 | 4 | 11571.814 | 0.006 | -0.00010 |          |        |
| 38: | 2 | 1 | 1 | 0 | 3 | 2 | 0 | 2 | 0 | 2 | 11578.548 | 0.007 | 0.00397  |          |        |
| 39: | 2 | 1 | 1 | 0 | 2 | 2 | 0 | 2 | 0 | 3 | 11583.727 | 0.005 | 0.00133  |          |        |
| 40: | 2 | 1 | 1 | 0 | 3 | 2 | 0 | 2 | 0 | 3 | 11595.389 | 0.007 | 0.00148  |          |        |
| 41: | 3 | 1 | 2 | 1 | 2 | 3 | 0 | 3 | 1 | 2 | 13565.239 | 0.010 | -0.00547 |          |        |
| 42: | 3 | 1 | 2 | 1 | 3 | 3 | 0 | 3 | 1 | 2 | 13573.264 | 0.009 | 0.00281  |          |        |
| 43: | 3 | 1 | 2 | 1 | 5 | 3 | 0 | 3 | 1 | 5 | 13579.298 | 0.008 | -0.00412 |          |        |
| 44: | 3 | 1 | 2 | 1 | 4 | 3 | 0 | 3 | 1 | 5 | 13587.347 | 0.049 | 0.02690  | 0.00031  | 0.5106 |
| 45: | 3 | 1 | 2 | 1 | 2 | 3 | 0 | 3 | 1 | 3 | 13587.347 | 0.049 | -0.02744 | 0.00031  | 0.4894 |
| 46: | 3 | 1 | 2 | 1 | 3 | 3 | 0 | 3 | 1 | 3 | 13595.385 | 0.003 | -0.00616 |          |        |
| 47: | 3 | 1 | 2 | 1 | 4 | 3 | 0 | 3 | 1 | 3 | 13599.141 | 0.007 | -0.00127 |          |        |
| 48: | 3 | 1 | 2 | 1 | 5 | 3 | 0 | 3 | 1 | 4 | 13601.456 | 0.006 | -0.00158 |          |        |
| 49: | 3 | 1 | 2 | 1 | 3 | 3 | 0 | 3 | 1 | 4 | 13605.721 | 0.012 | -0.00346 |          |        |
| 50: | 3 | 1 | 2 | 1 | 4 | 3 | 0 | 3 | 1 | 4 | 13609.475 | 0.008 | -0.00057 |          |        |
| 51: | 3 | 1 | 2 | 0 | 2 | 3 | 0 | 3 | 0 | 2 | 13623.775 | 0.009 | -0.00476 |          |        |
| 52: | 3 | 1 | 2 | 0 | 3 | 3 | 0 | 3 | 0 | 2 | 13633.956 | 0.008 | -0.00175 |          |        |
| 53: | 3 | 1 | 2 | 0 | 5 | 3 | 0 | 3 | 0 | 5 | 13641.558 | 0.012 | -0.00415 |          |        |
| 54: | 3 | 1 | 2 | 0 | 4 | 3 | 0 | 3 | 0 | 5 | 13651.754 | 0.011 | 0.00174  | 0.00040  | 0.5122 |
| 55: | 3 | 1 | 2 | 0 | 2 | 3 | 0 | 3 | 0 | 3 | 13651.754 | 0.011 | -0.00101 | 0.00040  | 0.4878 |
| 56: | 3 | 1 | 2 | 0 | 3 | 3 | 0 | 3 | 0 | 3 | 13661.933 | 0.006 | 0.00001  |          |        |
| 57: | 3 | 1 | 2 | 0 | 4 | 3 | 0 | 3 | 0 | 3 | 13666.701 | 0.010 | 0.00565  |          |        |
| 58: | 3 | 1 | 2 | 0 | 5 | 3 | 0 | 3 | 0 | 4 | 13669.568 | 0.031 | -0.00406 |          |        |
| 59: | 3 | 1 | 2 | 0 | 3 | 3 | 0 | 3 | 0 | 4 | 13675.000 | 0.007 | 0.00019  |          |        |
| 60: | 3 | 1 | 2 | 0 | 4 | 3 | 0 | 3 | 0 | 4 | 13679.760 | 0.015 | -0.00217 |          |        |
| 61: | 3 | 0 | 3 | 0 | 2 | 2 | 1 | 2 | 0 | 1 | 15677.957 | 0.008 | 0.01844  |          |        |
| 62: | 3 | 0 | 3 | 0 | 3 | 2 | 1 | 2 | 0 | 2 | 15686.858 | 0.010 | 0.01938  |          |        |
| 63: | 3 | 0 | 3 | 0 | 5 | 2 | 1 | 2 | 0 | 4 | 15691.215 | 0.005 | 0.00168  |          |        |
| 64: | 3 | 0 | 3 | 0 | 4 | 2 | 1 | 2 | 0 | 3 | 15700.060 | 0.006 | 0.00408  |          |        |
| 65: | 3 | 0 | 3 | 0 | 3 | 2 | 1 | 2 | 0 | 3 | 15713.128 | 0.007 | 0.00527  |          |        |
| 66: | 3 | 0 | 3 | 1 | 3 | 2 | 1 | 2 | 1 | 2 | 15761.498 | 0.010 | 0.00417  |          |        |
| 67: | 3 | 0 | 3 | 1 | 5 | 2 | 1 | 2 | 1 | 4 | 15764.987 | 0.010 | 0.00056  |          |        |
| 68: | 3 | 0 | 3 | 1 | 4 | 2 | 1 | 2 | 1 | 3 | 15771.888 | 0.009 | 0.00665  |          |        |
| 69: | 4 | 1 | 3 | 1 | 3 | 4 | 0 | 4 | 1 | 3 | 16686.710 | 0.018 | 0.00252  |          |        |
| 70: | 4 | 1 | 3 | 1 | 4 | 4 | 0 | 4 | 1 | 3 | 16691.772 | 0.033 | -0.00435 |          |        |
| 71: | 4 | 1 | 3 | 1 | 4 | 4 | 0 | 4 | 1 | 4 | 16718.198 | 0.006 | -0.00190 |          |        |
| 72: | 4 | 1 | 3 | 0 | 3 | 4 | 0 | 4 | 0 | 3 | 16719.820 | 0.019 | 0.00544  |          |        |
| 73: | 4 | 1 | 3 | 1 | 4 | 4 | 0 | 4 | 1 | 5 | 16727.466 | 0.018 | -0.00564 |          |        |
| 74: | 4 | 1 | 3 | 1 | 5 | 4 | 0 | 4 | 1 | 5 | 16729.263 | 0.016 | 0.00241  |          |        |
| 75: | 4 | 1 | 3 | 0 | 4 | 4 | 0 | 4 | 0 | 4 | 16759.643 | 0.008 | -0.00113 |          |        |
| 76: | 4 | 1 | 3 | 0 | 4 | 4 | 0 | 4 | 0 | 5 | 16771.354 | 0.008 | -0.00188 |          |        |
| 77: | 1 | 1 | 1 | 1 | 2 | 0 | 0 | 0 | 1 | 2 | 17085.911 | 0.006 | 0.00121  |          |        |
| 78: | 1 | 1 | 1 | 1 | 3 | 0 | 0 | 0 | 1 | 2 | 17098.825 | 0.020 | 0.00373  |          |        |
| 79: | 1 | 1 | 1 | 1 | 1 | 0 | 0 | 0 | 1 | 2 | 17109.079 | 0.005 | 0.00028  |          |        |
| 80: | 1 | 1 | 1 | 0 | 2 | 0 | 0 | 0 | 0 | 2 | 17183.757 | 0.007 | 0.00024  |          |        |
| 81: | 1 | 1 | 1 | 0 | 3 | 0 | 0 | 0 | 0 | 2 | 17200.136 | 0.006 | -0.00011 |          |        |
| 82: | 1 | 1 | 1 | 0 | 1 | 0 | 0 | 0 | 0 | 2 | 17213.147 | 0.010 | 0.00256  |          |        |
| 83: | 2 | 1 | 2 | 1 | 3 | 1 | 0 | 1 | 1 | 3 | 23957.650 | 0.100 | 0.04708  |          |        |
| 84: | 2 | 1 | 2 | 1 | 2 | 1 | 0 | 1 | 1 | 1 | 23965.230 | 0.100 | -0.16955 |          |        |
| 85: | 2 | 1 | 2 | 1 | 3 | 1 | 0 | 1 | 1 | 2 | 23973.870 | 0.100 | 0.10230  |          |        |
| 86: | 2 | 1 | 2 | 1 | 4 | 1 | 0 | 1 | 1 | 3 | 23986.750 | 0.100 | 0.09671  |          |        |
| 87: | 2 | 1 | 2 | 1 | 1 | 1 | 0 | 1 | 1 | 1 | 23994.550 | 0.100 | 0.09105  | 0.07447  | 0.4391 |
| 88: | 2 | 1 | 2 | 1 | 2 | 1 | 0 | 1 | 1 | 2 | 23994.550 | 0.100 | 0.06149  | 0.07447  | 0.5609 |
| 89: | 2 | 1 | 2 | 0 | 2 | 1 | 0 | 1 | 0 | 1 | 24073.440 | 0.100 | -0.04587 |          |        |
| 90: | 2 | 1 | 2 | 0 | 3 | 1 | 0 | 1 | 0 | 2 | 24084.000 | 0.100 | -0.11269 |          |        |
| 91: | 2 | 1 | 2 | 0 | 4 | 1 | 0 | 1 | 0 | 3 | 24100.420 | 0.100 | -0.03533 |          |        |
| 92: | 2 | 1 | 2 | 0 | 1 | 1 | 0 | 1 | 0 | 1 | 24110.320 | 0.100 | -0.04117 | -0.06116 | 0.4388 |
| 93: | 2 | 1 | 2 | 0 | 2 | 1 | 0 | 1 | 0 | 2 | 24110.320 | 0.100 | -0.07680 | -0.06116 | 0.5612 |

|      |    |    |    |   |    |    |    |    |   |    |            |       |          |          |        |
|------|----|----|----|---|----|----|----|----|---|----|------------|-------|----------|----------|--------|
| 94:  | 6  | 2  | 4  | 1 | 5  | 6  | 1  | 5  | 1 | 5  | 24111.820  | 0.100 | 0.11007  |          |        |
| 95:  | 6  | 2  | 4  | 1 | 7  | 6  | 1  | 5  | 1 | 7  | 24118.200  | 0.100 | 0.00044  |          |        |
| 96:  | 5  | 2  | 3  | 0 | 4  | 5  | 1  | 4  | 0 | 4  | 24308.650  | 0.100 | -0.05064 |          |        |
| 97:  | 5  | 2  | 3  | 0 | 7  | 5  | 1  | 4  | 0 | 7  | 24309.120  | 0.100 | 0.03589  |          |        |
| 98:  | 5  | 2  | 3  | 0 | 5  | 5  | 1  | 4  | 0 | 5  | 24310.050  | 0.100 | 0.05647  |          |        |
| 99:  | 5  | 2  | 3  | 0 | 6  | 5  | 1  | 4  | 0 | 6  | 24310.480  | 0.100 | 0.11202  |          |        |
| 100: | 6  | 2  | 4  | 0 | 8  | 6  | 1  | 5  | 0 | 8  | 24321.860  | 0.100 | 0.04836  |          |        |
| 101: | 6  | 2  | 4  | 0 | 6  | 6  | 1  | 5  | 0 | 6  | 24326.600  | 0.100 | -0.06069 |          |        |
| 102: | 6  | 2  | 4  | 0 | 7  | 6  | 1  | 5  | 0 | 7  | 24328.150  | 0.100 | -0.02089 |          |        |
| 103: | 7  | 2  | 5  | 0 | 6  | 7  | 1  | 6  | 0 | 6  | 25365.840  | 0.100 | 0.20570  |          |        |
| 104: | 7  | 2  | 5  | 0 | 9  | 7  | 1  | 6  | 0 | 9  | 25368.110  | 0.100 | 0.09064  |          |        |
| 105: | 17 | 5  | 12 | 0 | 18 | 17 | 4  | 13 | 0 | 18 | 66942.539  | 0.030 | 0.00247  |          |        |
| 106: | 17 | 5  | 12 | 0 | 17 | 17 | 4  | 13 | 0 | 17 | 66943.200  | 0.030 | 0.00156  |          |        |
| 107: | 17 | 5  | 12 | 0 | 19 | 17 | 4  | 13 | 0 | 19 | 66950.355  | 0.030 | 0.00644  |          |        |
| 108: | 17 | 5  | 12 | 0 | 16 | 17 | 4  | 13 | 0 | 16 | 66951.002  | 0.030 | 0.00279  |          |        |
| 109: | 18 | 12 | 7  | 0 | 17 | 19 | 11 | 8  | 0 | 18 | 67900.637  | 0.020 | 0.01778  | 0.01774  | 0.7500 |
| 110: | 18 | 12 | 6  | 0 | 17 | 19 | 11 | 9  | 0 | 18 | 67900.637  | 0.020 | 0.01762  | 0.01774  | 0.2500 |
| 111: | 18 | 12 | 7  | 0 | 20 | 19 | 11 | 8  | 0 | 21 | 67901.124  | 0.030 | -0.01451 | -0.01455 | 0.7504 |
| 112: | 18 | 12 | 6  | 0 | 20 | 19 | 11 | 9  | 0 | 21 | 67901.124  | 0.030 | -0.01467 | -0.01455 | 0.2496 |
| 113: | 10 | 4  | 7  | 1 | 9  | 10 | 3  | 8  | 1 | 9  | 67905.342  | 0.010 | 0.00446  |          |        |
| 114: | 18 | 12 | 7  | 0 | 18 | 19 | 11 | 8  | 0 | 19 | 67906.127  | 0.010 | 0.01254  | -0.00019 | 0.1954 |
| 115: | 18 | 12 | 6  | 0 | 18 | 19 | 11 | 9  | 0 | 19 | 67906.127  | 0.010 | 0.01238  | -0.00019 | 0.0652 |
| 116: | 10 | 4  | 7  | 1 | 12 | 10 | 3  | 8  | 1 | 12 | 67906.127  | 0.010 | -0.00466 | -0.00019 | 0.7394 |
| 117: | 18 | 12 | 7  | 0 | 19 | 19 | 11 | 8  | 0 | 20 | 67906.618  | 0.030 | 0.02638  | 0.02634  | 0.7493 |
| 118: | 18 | 12 | 6  | 0 | 19 | 19 | 11 | 9  | 0 | 20 | 67906.618  | 0.030 | 0.02622  | 0.02634  | 0.2507 |
| 119: | 10 | 4  | 7  | 1 | 10 | 10 | 3  | 8  | 1 | 10 | 67910.557  | 0.010 | 0.00517  |          |        |
| 120: | 10 | 4  | 7  | 1 | 11 | 10 | 3  | 8  | 1 | 11 | 67911.286  | 0.010 | 0.00021  |          |        |
| 121: | 27 | 8  | 19 | 0 | 26 | 26 | 9  | 18 | 0 | 25 | 67975.854  | 0.020 | 0.08506  | -0.00657 | 0.3511 |
| 122: | 27 | 8  | 19 | 0 | 29 | 26 | 9  | 18 | 0 | 28 | 67975.854  | 0.020 | -0.01290 | -0.00657 | 0.3924 |
| 123: | 9  | 4  | 6  | 0 | 8  | 9  | 3  | 7  | 0 | 8  | 67975.854  | 0.020 | -0.12231 | -0.00657 | 0.2565 |
| 124: | 9  | 4  | 6  | 0 | 11 | 9  | 3  | 7  | 0 | 11 | 67977.009  | 0.020 | 0.01138  |          |        |
| 125: | 27 | 8  | 19 | 0 | 27 | 26 | 9  | 18 | 0 | 26 | 67977.855  | 0.020 | 0.06238  | 0.00556  | 0.4905 |
| 126: | 27 | 8  | 19 | 0 | 28 | 26 | 9  | 18 | 0 | 27 | 67977.855  | 0.020 | -0.04914 | 0.00556  | 0.5095 |
| 127: | 9  | 4  | 6  | 0 | 9  | 9  | 3  | 7  | 0 | 9  | 67982.126  | 0.020 | 0.00532  |          |        |
| 128: | 9  | 4  | 6  | 0 | 10 | 9  | 3  | 7  | 0 | 10 | 67983.099  | 0.020 | 0.00218  |          |        |
| 129: | 39 | 13 | 26 | 0 | 41 | 38 | 14 | 25 | 0 | 40 | 68000.680  | 0.010 | 0.03296  | 0.00174  | 0.2599 |
| 130: | 39 | 13 | 26 | 0 | 38 | 38 | 14 | 25 | 0 | 37 | 68000.680  | 0.010 | 0.01125  | 0.00174  | 0.2406 |
| 131: | 39 | 13 | 26 | 0 | 40 | 38 | 14 | 25 | 0 | 39 | 68000.680  | 0.010 | -0.01739 | 0.00174  | 0.2524 |
| 132: | 39 | 13 | 26 | 0 | 39 | 38 | 14 | 25 | 0 | 38 | 68000.680  | 0.010 | -0.02081 | 0.00174  | 0.2470 |
| 133: | 17 | 3  | 14 | 1 | 17 | 17 | 2  | 15 | 1 | 17 | 68001.864  | 0.010 | 0.00481  |          |        |
| 134: | 17 | 3  | 14 | 1 | 18 | 17 | 2  | 15 | 1 | 18 | 68003.398  | 0.010 | -0.00114 |          |        |
| 135: | 20 | 6  | 14 | 0 | 21 | 20 | 5  | 15 | 0 | 21 | 86821.402  | 0.025 | 0.01842  |          |        |
| 136: | 20 | 6  | 14 | 0 | 20 | 20 | 5  | 15 | 0 | 20 | 86821.971  | 0.025 | -0.00814 |          |        |
| 137: | 8  | 5  | 4  | 0 | 8  | 8  | 4  | 5  | 0 | 8  | 86824.203  | 0.015 | 0.01225  |          |        |
| 138: | 8  | 5  | 4  | 0 | 9  | 8  | 4  | 5  | 0 | 9  | 86825.364  | 0.015 | 0.00271  |          |        |
| 139: | 17 | 4  | 14 | 0 | 16 | 17 | 3  | 15 | 0 | 16 | 86858.691  | 0.020 | -0.00423 |          |        |
| 140: | 17 | 4  | 14 | 0 | 19 | 17 | 3  | 15 | 0 | 19 | 86859.851  | 0.020 | -0.00836 |          |        |
| 141: | 10 | 2  | 9  | 0 | 11 | 9  | 1  | 8  | 0 | 10 | 86934.629  | 0.010 | 0.00275  |          |        |
| 142: | 10 | 2  | 9  | 0 | 10 | 9  | 1  | 8  | 0 | 9  | 86936.425  | 0.020 | -0.00590 |          |        |
| 143: | 10 | 2  | 9  | 0 | 12 | 9  | 1  | 8  | 0 | 11 | 86948.765  | 0.025 | -0.00543 |          |        |
| 144: | 10 | 2  | 9  | 0 | 9  | 9  | 1  | 8  | 0 | 8  | 86950.538  | 0.025 | -0.01150 |          |        |
| 145: | 30 | 6  | 25 | 0 | 31 | 29 | 7  | 22 | 0 | 30 | 89243.003  | 0.020 | 0.00289  |          |        |
| 146: | 30 | 6  | 25 | 0 | 30 | 29 | 7  | 22 | 0 | 29 | 89243.981  | 0.020 | -0.00433 |          |        |
| 147: | 17 | 2  | 15 | 0 | 16 | 17 | 1  | 16 | 0 | 16 | 92541.279  | 0.010 | 0.00622  |          |        |
| 148: | 17 | 2  | 15 | 0 | 17 | 17 | 1  | 16 | 0 | 17 | 92562.791  | 0.020 | -0.00679 |          |        |
| 149: | 17 | 2  | 15 | 0 | 18 | 17 | 1  | 16 | 0 | 18 | 92564.643  | 0.010 | -0.00717 |          |        |
| 150: | 22 | 4  | 19 | 0 | 21 | 22 | 3  | 20 | 0 | 21 | 116424.281 | 0.015 | 0.00420  |          |        |
| 151: | 22 | 4  | 19 | 0 | 24 | 22 | 3  | 20 | 0 | 24 | 116425.235 | 0.015 | -0.00897 |          |        |
| 152: | 9  | 5  | 5  | 0 | 8  | 8  | 4  | 4  | 0 | 7  | 159909.048 | 0.030 | -0.02528 |          |        |
| 153: | 9  | 5  | 5  | 0 | 11 | 8  | 4  | 4  | 0 | 10 | 159909.484 | 0.030 | -0.00425 |          |        |
| 154: | 9  | 5  | 5  | 0 | 9  | 8  | 4  | 4  | 0 | 8  | 159911.178 | 0.030 | -0.02256 |          |        |
| 155: | 9  | 5  | 5  | 0 | 10 | 8  | 4  | 4  | 0 | 9  | 159911.590 | 0.030 | 0.00315  |          |        |
| 156: | 9  | 5  | 4  | 0 | 8  | 8  | 4  | 5  | 0 | 7  | 160051.110 | 0.030 | 0.02602  |          |        |
| 157: | 9  | 5  | 4  | 0 | 11 | 8  | 4  | 5  | 0 | 10 | 160051.677 | 0.030 | 0.05878  |          |        |
| 158: | 9  | 5  | 4  | 0 | 9  | 8  | 4  | 5  | 0 | 8  | 160053.885 | 0.030 | -0.00169 |          |        |
| 159: | 9  | 5  | 4  | 0 | 10 | 8  | 4  | 5  | 0 | 9  | 160054.460 | 0.030 | 0.06585  |          |        |
| 160: | 11 | 4  | 7  | 0 | 10 | 10 | 3  | 8  | 0 | 9  | 160127.576 | 0.020 | 0.02464  |          |        |
| 161: | 11 | 4  | 7  | 0 | 13 | 10 | 3  | 8  | 0 | 12 | 160128.950 | 0.010 | -0.00632 |          |        |
| 162: | 11 | 4  | 7  | 0 | 11 | 10 | 3  | 8  | 0 | 10 | 160136.981 | 0.010 | -0.00634 |          |        |
| 163: | 11 | 4  | 7  | 0 | 12 | 10 | 3  | 8  | 0 | 11 | 160138.344 | 0.010 | -0.00604 |          |        |
| 164: | 21 | 2  | 19 | 1 | 21 | 20 | 3  | 18 | 1 | 20 | 161379.487 | 0.010 | 0.00920  | -0.00085 | 0.4884 |
| 165: | 21 | 2  | 19 | 1 | 22 | 20 | 3  | 18 | 1 | 21 | 161379.487 | 0.010 | -0.01044 | -0.00085 | 0.5116 |
| 166: | 21 | 2  | 19 | 1 | 20 | 20 | 3  | 18 | 1 | 19 | 161380.481 | 0.010 | 0.01226  | 0.00056  | 0.4653 |
| 167: | 21 | 2  | 19 | 1 | 23 | 20 | 3  | 18 | 1 | 22 | 161380.481 | 0.010 | -0.00962 | 0.00056  | 0.5347 |
| 168: | 21 | 2  | 19 | 0 | 21 | 20 | 3  | 18 | 0 | 20 | 161601.318 | 0.010 | 0.01074  | -0.00322 | 0.4879 |
| 169: | 21 | 2  | 19 | 0 | 22 | 20 | 3  | 18 | 0 | 21 | 161601.318 | 0.010 | -0.01652 | -0.00322 | 0.5121 |
| 170: | 21 | 2  | 19 | 0 | 20 | 20 | 3  | 18 | 0 | 19 | 161602.535 | 0.010 | 0.01267  | -0.00306 | 0.4643 |
| 171: | 21 | 2  | 19 | 0 | 23 | 20 | 3  | 18 | 0 | 22 | 161602.535 | 0.010 | -0.01670 | -0.00306 | 0.5357 |
| 172: | 14 | 4  | 11 | 0 | 15 | 13 | 3  | 10 | 0 | 14 | 161728.950 | 0.010 | -0.00754 |          |        |
| 173: | 14 | 4  | 11 | 0 | 14 | 13 | 3  | 10 | 0 | 13 | 161730.719 | 0.010 | -0.01026 |          |        |
| 174: | 14 | 4  | 11 | 0 | 16 | 13 | 3  | 10 | 0 | 15 | 161745.607 | 0.010 | 0.00655  |          |        |
| 175: | 14 | 4  | 11 | 0 | 13 | 13 | 3  | 10 | 0 | 12 | 161747.374 | 0.010 | 0.00668  |          |        |

|      |    |    |    |   |    |    |    |    |   |    |            |       |          |          |        |
|------|----|----|----|---|----|----|----|----|---|----|------------|-------|----------|----------|--------|
| 176: | 22 | 1  | 21 | 1 | 22 | 21 | 2  | 20 | 1 | 21 | 161835.361 | 0.010 | 0.03051  | -0.00471 | 0.4880 |
| 177: | 22 | 1  | 21 | 1 | 23 | 21 | 2  | 20 | 1 | 22 | 161835.361 | 0.010 | -0.03829 | -0.00471 | 0.5120 |
| 178: | 22 | 1  | 21 | 1 | 21 | 21 | 2  | 20 | 1 | 20 | 161836.182 | 0.010 | 0.03526  | -0.00349 | 0.4652 |
| 179: | 22 | 1  | 21 | 1 | 24 | 21 | 2  | 20 | 1 | 23 | 161836.182 | 0.010 | -0.03720 | -0.00349 | 0.5348 |
| 180: | 22 | 2  | 21 | 1 | 22 | 21 | 1  | 20 | 1 | 21 | 161874.147 | 0.010 | 0.03330  | -0.00058 | 0.4891 |
| 181: | 22 | 2  | 21 | 1 | 23 | 21 | 1  | 20 | 1 | 22 | 161874.147 | 0.010 | -0.03301 | -0.00058 | 0.5109 |
| 182: | 22 | 2  | 21 | 1 | 21 | 21 | 1  | 20 | 1 | 20 | 161875.004 | 0.010 | 0.04032  | 0.00284  | 0.4664 |
| 183: | 22 | 2  | 21 | 1 | 24 | 21 | 1  | 20 | 1 | 23 | 161875.004 | 0.010 | -0.02991 | 0.00284  | 0.5336 |
| 184: | 34 | 10 | 25 | 0 | 35 | 34 | 9  | 26 | 0 | 35 | 169346.813 | 0.010 | 0.00119  | -0.00728 | 0.5075 |
| 185: | 34 | 10 | 25 | 0 | 34 | 34 | 9  | 26 | 0 | 34 | 169346.813 | 0.010 | -0.01602 | -0.00728 | 0.4925 |
| 186: | 34 | 10 | 25 | 0 | 36 | 34 | 9  | 26 | 0 | 36 | 169347.470 | 0.010 | -0.00164 | -0.00512 | 0.5220 |
| 187: | 34 | 10 | 25 | 0 | 33 | 34 | 9  | 26 | 0 | 33 | 169347.470 | 0.010 | -0.00891 | -0.00512 | 0.4780 |
| 188: | 32 | 10 | 22 | 0 | 34 | 32 | 9  | 23 | 0 | 34 | 169445.628 | 0.010 | 0.03462  | -0.00528 | 0.5229 |
| 189: | 32 | 10 | 22 | 0 | 31 | 32 | 9  | 23 | 0 | 31 | 169445.628 | 0.010 | -0.04901 | -0.00528 | 0.4771 |
| 190: | 41 | 10 | 32 | 0 | 40 | 41 | 9  | 33 | 0 | 40 | 169462.063 | 0.010 | 0.06255  | 0.00518  | 0.4819 |
| 191: | 41 | 10 | 32 | 0 | 43 | 41 | 9  | 33 | 0 | 43 | 169462.063 | 0.010 | -0.04817 | 0.00518  | 0.5181 |
| 192: | 41 | 10 | 32 | 0 | 41 | 41 | 9  | 33 | 0 | 41 | 169464.718 | 0.010 | 0.05987  | 0.00662  | 0.4940 |
| 193: | 41 | 10 | 32 | 0 | 42 | 41 | 9  | 33 | 0 | 42 | 169464.718 | 0.010 | -0.04536 | 0.00662  | 0.5060 |
| 194: | 23 | 4  | 19 | 1 | 22 | 22 | 5  | 18 | 1 | 21 | 169554.597 | 0.020 | -0.01347 |          |        |
| 195: | 23 | 4  | 19 | 1 | 25 | 22 | 5  | 18 | 1 | 24 | 169555.046 | 0.020 | 0.00236  |          |        |
| 196: | 23 | 4  | 19 | 1 | 23 | 22 | 5  | 18 | 1 | 22 | 169561.029 | 0.020 | -0.00721 |          |        |
| 197: | 23 | 4  | 19 | 1 | 24 | 22 | 5  | 18 | 1 | 23 | 169561.478 | 0.020 | 0.00655  |          |        |
| 198: | 34 | 6  | 29 | 0 | 33 | 34 | 5  | 30 | 0 | 33 | 169925.176 | 0.020 | -0.00410 |          |        |
| 199: | 34 | 6  | 29 | 0 | 36 | 34 | 5  | 30 | 0 | 36 | 169925.632 | 0.020 | 0.00585  |          |        |
| 200: | 34 | 6  | 29 | 0 | 35 | 34 | 5  | 30 | 0 | 35 | 169935.413 | 0.020 | 0.00813  |          |        |
| 201: | 40 | 7  | 33 | 0 | 39 | 40 | 6  | 34 | 0 | 39 | 169945.520 | 0.020 | -0.00861 |          |        |
| 202: | 40 | 7  | 33 | 0 | 42 | 40 | 6  | 34 | 0 | 42 | 169945.958 | 0.020 | 0.00079  |          |        |
| 203: | 34 | 8  | 26 | 1 | 33 | 33 | 9  | 25 | 1 | 32 | 169946.735 | 0.030 | -0.01680 | -0.01680 | 0.5892 |
| 204: | 34 | 8  | 26 | 1 | 33 | 33 | 9  | 25 | 1 | 32 | 169946.735 | 0.020 | -0.01680 | -0.01680 | 0.4108 |
| 205: | 34 | 8  | 26 | 1 | 36 | 33 | 9  | 25 | 1 | 35 | 169947.131 | 0.020 | 0.01033  | 0.01033  | 0.5892 |
| 206: | 34 | 8  | 26 | 1 | 36 | 33 | 9  | 25 | 1 | 35 | 169947.131 | 0.020 | 0.01033  | 0.01033  | 0.4108 |
| 207: | 66 | 20 | 47 | 0 | 68 | 65 | 21 | 44 | 0 | 67 | 169948.678 | 0.020 | 0.00096  | -0.00437 | 0.5112 |
| 208: | 66 | 20 | 47 | 0 | 65 | 65 | 21 | 44 | 0 | 64 | 169948.678 | 0.020 | -0.00995 | -0.00437 | 0.4888 |
| 209: | 66 | 20 | 47 | 0 | 66 | 65 | 21 | 44 | 0 | 65 | 169949.188 | 0.020 | 0.00557  | 0.00323  | 0.4957 |
| 210: | 66 | 20 | 47 | 0 | 67 | 65 | 21 | 44 | 0 | 66 | 169949.188 | 0.020 | 0.00092  | 0.00323  | 0.5043 |
| 211: | 41 | 27 | 14 | 0 | 40 | 42 | 26 | 17 | 0 | 41 | 169950.506 | 0.030 | 0.08836  | 0.00085  | 0.4826 |
| 212: | 41 | 27 | 14 | 0 | 43 | 42 | 26 | 17 | 0 | 44 | 169950.506 | 0.030 | -0.08078 | 0.00085  | 0.5174 |
| 213: | 34 | 8  | 26 | 1 | 34 | 33 | 9  | 25 | 1 | 33 | 169956.058 | 0.030 | -0.01525 | -0.01525 | 0.5889 |
| 214: | 34 | 8  | 26 | 1 | 34 | 33 | 9  | 25 | 1 | 33 | 169956.058 | 0.030 | -0.01525 | -0.01525 | 0.4111 |
| 215: | 40 | 7  | 33 | 0 | 40 | 40 | 6  | 34 | 0 | 40 | 169956.717 | 0.020 | -0.00852 |          |        |
| 216: | 40 | 7  | 33 | 0 | 41 | 40 | 6  | 34 | 0 | 41 | 169957.155 | 0.020 | 0.01146  |          |        |
| 217: | 34 | 6  | 29 | 1 | 33 | 34 | 5  | 30 | 1 | 33 | 170135.174 | 0.020 | -0.01436 |          |        |
| 218: | 34 | 6  | 29 | 1 | 36 | 34 | 5  | 30 | 1 | 36 | 170135.549 | 0.020 | 0.00991  |          |        |
| 219: | 34 | 6  | 29 | 1 | 34 | 34 | 5  | 30 | 1 | 34 | 170142.857 | 0.020 | -0.01951 |          |        |
| 220: | 34 | 6  | 29 | 1 | 35 | 34 | 5  | 30 | 1 | 35 | 170143.226 | 0.020 | 0.01126  |          |        |
| 221: | 40 | 11 | 29 | 0 | 41 | 40 | 10 | 30 | 0 | 41 | 170336.358 | 0.030 | 0.13137  | 0.03773  | 0.5060 |
| 222: | 40 | 11 | 29 | 0 | 40 | 40 | 10 | 30 | 0 | 40 | 170336.358 | 0.030 | -0.05818 | 0.03773  | 0.4940 |
| 223: | 40 | 11 | 29 | 0 | 42 | 40 | 10 | 30 | 0 | 42 | 170341.647 | 0.040 | 0.09090  | 0.00771  | 0.5186 |
| 224: | 40 | 11 | 29 | 0 | 39 | 40 | 10 | 30 | 0 | 39 | 170341.647 | 0.040 | -0.08189 | 0.00771  | 0.4814 |
| 225: | 19 | 4  | 16 | 1 | 20 | 18 | 3  | 15 | 1 | 19 | 170565.068 | 0.040 | 0.00553  |          |        |
| 226: | 19 | 4  | 16 | 1 | 19 | 18 | 3  | 15 | 1 | 18 | 170565.800 | 0.030 | -0.00302 |          |        |
| 227: | 19 | 4  | 16 | 1 | 21 | 18 | 3  | 15 | 1 | 20 | 170574.883 | 0.020 | 0.01259  |          |        |
| 228: | 19 | 4  | 16 | 1 | 18 | 18 | 3  | 15 | 1 | 17 | 170575.601 | 0.030 | -0.00037 |          |        |
| 229: | 31 | 7  | 24 | 1 | 30 | 30 | 8  | 23 | 1 | 29 | 171006.573 | 0.020 | 0.00660  |          |        |
| 230: | 31 | 7  | 24 | 1 | 33 | 30 | 8  | 23 | 1 | 32 | 171007.075 | 0.020 | 0.01376  |          |        |
| 231: | 37 | 6  | 31 | 1 | 36 | 37 | 5  | 32 | 1 | 36 | 171008.763 | 0.030 | -0.00616 |          |        |
| 232: | 37 | 6  | 31 | 1 | 39 | 37 | 5  | 32 | 1 | 39 | 171009.135 | 0.030 | 0.01776  |          |        |
| 233: | 37 | 6  | 31 | 1 | 38 | 37 | 5  | 32 | 1 | 38 | 171017.509 | 0.030 | 0.04009  |          |        |
| 234: | 42 | 10 | 33 | 1 | 41 | 42 | 9  | 34 | 1 | 41 | 171168.559 | 0.010 | 0.05616  | 0.00044  | 0.4816 |
| 235: | 42 | 10 | 33 | 1 | 44 | 42 | 9  | 34 | 1 | 44 | 171168.559 | 0.010 | -0.05132 | 0.00044  | 0.5184 |
| 236: | 42 | 10 | 33 | 1 | 42 | 42 | 9  | 34 | 1 | 42 | 171171.367 | 0.010 | 0.05450  | -0.00106 | 0.4945 |
| 237: | 42 | 10 | 33 | 1 | 43 | 42 | 9  | 34 | 1 | 43 | 171171.367 | 0.010 | -0.05541 | -0.00106 | 0.5055 |
| 238: | 64 | 15 | 49 | 0 | 66 | 64 | 14 | 50 | 0 | 66 | 171179.546 | 0.030 | 0.03489  | -0.00972 | 0.5117 |
| 239: | 64 | 15 | 49 | 0 | 63 | 64 | 14 | 50 | 0 | 63 | 171179.546 | 0.030 | -0.05647 | -0.00972 | 0.4883 |
| 240: | 32 | 4  | 28 | 0 | 31 | 32 | 3  | 29 | 0 | 31 | 171246.011 | 0.020 | -0.00998 |          |        |
| 241: | 32 | 4  | 28 | 0 | 34 | 32 | 3  | 29 | 0 | 34 | 171246.530 | 0.020 | -0.00992 |          |        |
| 242: | 32 | 4  | 28 | 0 | 32 | 32 | 3  | 29 | 0 | 32 | 171256.820 | 0.020 | 0.00910  |          |        |
| 243: | 32 | 4  | 28 | 0 | 33 | 32 | 3  | 29 | 0 | 33 | 171257.324 | 0.020 | 0.00955  |          |        |
| 244: | 40 | 7  | 33 | 1 | 39 | 40 | 6  | 34 | 1 | 39 | 171274.231 | 0.030 | -0.02082 |          |        |
| 245: | 40 | 7  | 33 | 1 | 42 | 40 | 6  | 34 | 1 | 42 | 171274.579 | 0.030 | -0.00381 |          |        |
| 246: | 40 | 7  | 33 | 1 | 40 | 40 | 6  | 34 | 1 | 40 | 171282.854 | 0.030 | -0.02124 |          |        |
| 247: | 40 | 7  | 33 | 1 | 41 | 40 | 6  | 34 | 1 | 41 | 171283.205 | 0.030 | 0.00731  |          |        |
| 248: | 26 | 1  | 25 | 0 | 25 | 26 | 0  | 26 | 0 | 25 | 171357.008 | 0.010 | 0.00417  |          |        |
| 249: | 26 | 1  | 25 | 0 | 28 | 26 | 0  | 26 | 0 | 28 | 171357.767 | 0.020 | -0.00328 |          |        |
| 250: | 26 | 2  | 25 | 0 | 25 | 26 | 1  | 26 | 0 | 25 | 171358.482 | 0.010 | 0.00798  |          |        |
| 251: | 26 | 2  | 25 | 0 | 28 | 26 | 1  | 26 | 0 | 28 | 171359.241 | 0.010 | 0.00061  |          |        |
| 252: | 31 | 10 | 22 | 1 | 32 | 31 | 9  | 23 | 1 | 32 | 171362.693 | 0.020 | 0.01778  | 0.00787  | 0.5090 |
| 253: | 31 | 10 | 22 | 1 | 31 | 31 | 9  | 23 | 1 | 31 | 171362.693 | 0.020 | -0.00240 | 0.00787  | 0.4910 |
| 254: | 31 | 10 | 22 | 1 | 33 | 31 | 9  | 23 | 1 | 33 | 171363.244 | 0.020 | 0.01237  | 0.01145  | 0.5247 |
| 255: | 31 | 10 | 22 | 1 | 30 | 31 | 9  | 23 | 1 | 30 | 171363.244 | 0.020 | 0.01042  | 0.01145  | 0.4753 |

|      |    |    |    |   |    |    |    |    |   |    |            |       |          |          |        |
|------|----|----|----|---|----|----|----|----|---|----|------------|-------|----------|----------|--------|
| 256: | 26 | 1  | 25 | 0 | 26 | 26 | 0  | 26 | 0 | 26 | 171370.145 | 0.010 | 0.00004  |          |        |
| 257: | 26 | 1  | 25 | 0 | 27 | 26 | 0  | 26 | 0 | 27 | 171370.894 | 0.020 | -0.00829 |          |        |
| 258: | 26 | 2  | 25 | 0 | 26 | 26 | 1  | 26 | 0 | 26 | 171371.610 | 0.010 | -0.00375 |          |        |
| 259: | 26 | 2  | 25 | 0 | 27 | 26 | 1  | 26 | 0 | 27 | 171372.366 | 0.010 | -0.00500 |          |        |
| 260: | 32 | 4  | 28 | 1 | 31 | 32 | 3  | 29 | 1 | 31 | 171393.344 | 0.020 | 0.00207  |          |        |
| 261: | 32 | 4  | 28 | 1 | 34 | 32 | 3  | 29 | 1 | 34 | 171393.743 | 0.020 | -0.00538 |          |        |
| 262: | 32 | 4  | 28 | 1 | 32 | 32 | 3  | 29 | 1 | 32 | 171401.762 | 0.020 | -0.01107 |          |        |
| 263: | 32 | 4  | 28 | 1 | 33 | 32 | 3  | 29 | 1 | 33 | 171402.180 | 0.020 | 0.01289  |          |        |
| 264: | 30 | 10 | 20 | 1 | 32 | 30 | 9  | 21 | 1 | 32 | 171655.208 | 0.030 | -0.00203 | -0.01574 | 0.5236 |
| 265: | 30 | 10 | 20 | 1 | 29 | 30 | 9  | 21 | 1 | 29 | 171655.208 | 0.030 | -0.03080 | -0.01574 | 0.4764 |
| 266: | 11 | 5  | 6  | 0 | 11 | 10 | 4  | 7  | 0 | 10 | 176208.133 | 0.020 | -0.01009 |          |        |
| 267: | 11 | 5  | 6  | 0 | 12 | 10 | 4  | 7  | 0 | 11 | 176208.569 | 0.020 | 0.00900  |          |        |
| 268: | 27 | 10 | 17 | 0 | 27 | 27 | 9  | 18 | 0 | 27 | 177743.644 | 0.020 | 0.07182  | -0.01218 | 0.2450 |
| 269: | 27 | 10 | 17 | 0 | 28 | 27 | 9  | 18 | 0 | 28 | 177743.644 | 0.020 | 0.06964  | -0.01218 | 0.2542 |
| 270: | 27 | 10 | 17 | 0 | 26 | 27 | 9  | 18 | 0 | 26 | 177743.644 | 0.020 | -0.08338 | -0.01218 | 0.2368 |
| 271: | 27 | 10 | 17 | 0 | 29 | 27 | 9  | 18 | 0 | 29 | 177743.644 | 0.020 | -0.10507 | -0.01218 | 0.2640 |
| 272: | 25 | 10 | 16 | 1 | 24 | 25 | 9  | 17 | 1 | 24 | 177759.309 | 0.030 | 0.00148  | -0.02384 | 0.4716 |
| 273: | 25 | 10 | 16 | 1 | 27 | 25 | 9  | 17 | 1 | 27 | 177759.309 | 0.030 | -0.04644 | -0.02384 | 0.5284 |
| 274: | 25 | 10 | 16 | 1 | 25 | 25 | 9  | 17 | 1 | 25 | 177759.677 | 0.040 | 0.02566  | 0.01039  | 0.4891 |
| 275: | 25 | 10 | 16 | 1 | 26 | 25 | 9  | 17 | 1 | 26 | 177759.677 | 0.040 | -0.00423 | 0.01039  | 0.5109 |
| 276: | 51 | 10 | 41 | 0 | 50 | 51 | 9  | 42 | 0 | 50 | 177760.424 | 0.040 | -0.01648 |          |        |
| 277: | 51 | 10 | 41 | 0 | 53 | 51 | 9  | 42 | 0 | 53 | 177760.775 | 0.040 | 0.00373  |          |        |
| 278: | 51 | 10 | 41 | 0 | 51 | 51 | 9  | 42 | 0 | 51 | 177771.491 | 0.040 | -0.02201 |          |        |
| 279: | 51 | 10 | 41 | 0 | 52 | 51 | 9  | 42 | 0 | 52 | 177771.846 | 0.040 | 0.00869  |          |        |
| 280: | 27 | 10 | 18 | 0 | 27 | 27 | 9  | 19 | 0 | 27 | 177895.751 | 0.020 | 0.01529  | 0.00015  | 0.2450 |
| 281: | 27 | 10 | 18 | 0 | 26 | 27 | 9  | 19 | 0 | 26 | 177895.751 | 0.020 | 0.00578  | 0.00015  | 0.2368 |
| 282: | 27 | 10 | 18 | 0 | 28 | 27 | 9  | 19 | 0 | 28 | 177895.751 | 0.020 | 0.00481  | 0.00015  | 0.2542 |
| 283: | 27 | 10 | 18 | 0 | 29 | 27 | 9  | 19 | 0 | 29 | 177895.751 | 0.020 | -0.02343 | 0.00015  | 0.2639 |
| 284: | 42 | 9  | 34 | 1 | 41 | 42 | 8  | 35 | 1 | 41 | 177897.309 | 0.040 | 0.11812  | 0.01243  | 0.4826 |
| 285: | 42 | 9  | 34 | 1 | 44 | 42 | 8  | 35 | 1 | 44 | 177897.309 | 0.040 | -0.08614 | 0.01243  | 0.5174 |
| 286: | 39 | 14 | 26 | 0 | 39 | 38 | 13 | 25 | 0 | 38 | 573165.619 | 0.040 | 0.02296  | 0.00343  | 0.2467 |
| 287: | 39 | 14 | 26 | 0 | 38 | 38 | 13 | 25 | 0 | 37 | 573165.619 | 0.040 | 0.01183  | 0.00343  | 0.2401 |
| 288: | 39 | 14 | 26 | 0 | 40 | 38 | 13 | 25 | 0 | 39 | 573165.619 | 0.040 | 0.00708  | 0.00343  | 0.2533 |
| 289: | 39 | 14 | 26 | 0 | 41 | 38 | 13 | 25 | 0 | 40 | 573165.619 | 0.040 | -0.02645 | 0.00343  | 0.2599 |
| 290: | 39 | 14 | 25 | 0 | 39 | 38 | 13 | 26 | 0 | 38 | 573172.358 | 0.030 | 0.01714  | -0.00004 | 0.2468 |
| 291: | 39 | 14 | 25 | 0 | 38 | 38 | 13 | 26 | 0 | 37 | 573172.358 | 0.030 | 0.01088  | -0.00004 | 0.2407 |
| 292: | 39 | 14 | 25 | 0 | 40 | 38 | 13 | 26 | 0 | 39 | 573172.358 | 0.030 | 0.00106  | -0.00004 | 0.2530 |
| 293: | 39 | 14 | 25 | 0 | 41 | 38 | 13 | 26 | 0 | 40 | 573172.358 | 0.030 | -0.02758 | -0.00004 | 0.2596 |
| 294: | 42 | 13 | 30 | 0 | 43 | 41 | 12 | 29 | 0 | 42 | 573711.078 | 0.070 | -0.00245 | -0.00960 | 0.5060 |
| 295: | 42 | 13 | 30 | 0 | 42 | 41 | 12 | 29 | 0 | 41 | 573711.078 | 0.070 | -0.01691 | -0.00960 | 0.4940 |
| 296: | 42 | 13 | 30 | 0 | 41 | 41 | 12 | 29 | 0 | 40 | 573711.961 | 0.070 | 0.05275  | 0.05043  | 0.4820 |
| 297: | 42 | 13 | 30 | 0 | 44 | 41 | 12 | 29 | 0 | 43 | 573711.961 | 0.070 | 0.04827  | 0.05043  | 0.5180 |
| 298: | 34 | 16 | 19 | 0 | 33 | 33 | 15 | 18 | 0 | 32 | 574124.969 | 0.050 | 0.33013  | -0.00163 | 0.1794 |
| 299: | 34 | 16 | 18 | 0 | 33 | 33 | 15 | 19 | 0 | 32 | 574124.969 | 0.050 | 0.32987  | -0.00163 | 0.0598 |
| 300: | 34 | 16 | 19 | 0 | 36 | 33 | 15 | 18 | 0 | 35 | 574124.969 | 0.050 | 0.26016  | -0.00163 | 0.1959 |
| 301: | 34 | 16 | 18 | 0 | 36 | 33 | 15 | 19 | 0 | 35 | 574124.969 | 0.050 | 0.25991  | -0.00163 | 0.0653 |
| 302: | 34 | 16 | 19 | 0 | 34 | 33 | 15 | 18 | 0 | 33 | 574124.969 | 0.050 | -0.27531 | -0.00163 | 0.1846 |
| 303: | 34 | 16 | 18 | 0 | 34 | 33 | 15 | 19 | 0 | 33 | 574124.969 | 0.050 | -0.27556 | -0.00163 | 0.0615 |
| 304: | 34 | 16 | 19 | 0 | 35 | 33 | 15 | 18 | 0 | 34 | 574124.969 | 0.050 | -0.31843 | -0.00163 | 0.1902 |
| 305: | 34 | 16 | 18 | 0 | 35 | 33 | 15 | 19 | 0 | 34 | 574124.969 | 0.050 | -0.31869 | -0.00163 | 0.0633 |
| 306: | 82 | 2  | 81 | 0 | 82 | 81 | 1  | 80 | 0 | 81 | 574504.454 | 0.030 | 0.04700  | 0.00012  | 0.1865 |
| 307: | 82 | 1  | 81 | 0 | 82 | 81 | 2  | 80 | 0 | 81 | 574504.454 | 0.030 | 0.04700  | 0.00012  | 0.0621 |
| 308: | 82 | 2  | 81 | 0 | 83 | 81 | 1  | 80 | 0 | 82 | 574504.454 | 0.030 | 0.03148  | 0.00012  | 0.1889 |
| 309: | 82 | 1  | 81 | 0 | 83 | 81 | 2  | 80 | 0 | 82 | 574504.454 | 0.030 | 0.03148  | 0.00012  | 0.0629 |
| 310: | 82 | 2  | 81 | 0 | 81 | 81 | 1  | 80 | 0 | 80 | 574504.454 | 0.030 | -0.02906 | 0.00012  | 0.1842 |
| 311: | 82 | 1  | 81 | 0 | 81 | 81 | 2  | 80 | 0 | 80 | 574504.454 | 0.030 | -0.02906 | 0.00012  | 0.0614 |
| 312: | 82 | 2  | 81 | 0 | 84 | 81 | 1  | 80 | 0 | 83 | 574504.454 | 0.030 | -0.04863 | 0.00012  | 0.1905 |
| 313: | 82 | 1  | 81 | 0 | 84 | 81 | 2  | 80 | 0 | 83 | 574504.454 | 0.030 | -0.04863 | 0.00012  | 0.0636 |
| 314: | 27 | 19 | 8  | 0 | 26 | 26 | 18 | 9  | 0 | 25 | 576292.152 | 0.060 | -0.01142 | -0.05229 | 0.3545 |
| 315: | 27 | 19 | 9  | 0 | 26 | 26 | 18 | 8  | 0 | 25 | 576292.152 | 0.060 | -0.01142 | -0.05229 | 0.1182 |
| 316: | 27 | 19 | 8  | 0 | 29 | 26 | 18 | 9  | 0 | 28 | 576292.152 | 0.060 | -0.08893 | -0.05229 | 0.3952 |
| 317: | 27 | 19 | 9  | 0 | 29 | 26 | 18 | 8  | 0 | 28 | 576292.152 | 0.060 | -0.08893 | -0.05229 | 0.1321 |
| 318: | 27 | 19 | 8  | 0 | 27 | 26 | 18 | 9  | 0 | 26 | 576293.102 | 0.060 | 0.03346  | 0.01093  | 0.3679 |
| 319: | 27 | 19 | 9  | 0 | 27 | 26 | 18 | 8  | 0 | 26 | 576293.102 | 0.060 | 0.03346  | 0.01093  | 0.1228 |
| 320: | 27 | 19 | 8  | 0 | 28 | 26 | 18 | 9  | 0 | 27 | 576293.102 | 0.060 | -0.01077 | 0.01093  | 0.3819 |
| 321: | 27 | 19 | 9  | 0 | 28 | 26 | 18 | 8  | 0 | 27 | 576293.102 | 0.060 | -0.01077 | 0.01093  | 0.1274 |
| 322: | 40 | 14 | 27 | 0 | 40 | 39 | 13 | 26 | 0 | 39 | 580689.658 | 0.020 | 0.06160  | 0.00146  | 0.2467 |
| 323: | 40 | 14 | 27 | 0 | 41 | 39 | 13 | 26 | 0 | 40 | 580689.658 | 0.020 | 0.04932  | 0.00146  | 0.2530 |
| 324: | 40 | 14 | 27 | 0 | 39 | 39 | 13 | 26 | 0 | 38 | 580689.658 | 0.020 | -0.03465 | 0.00146  | 0.2409 |
| 325: | 40 | 14 | 27 | 0 | 42 | 39 | 13 | 26 | 0 | 41 | 580689.658 | 0.020 | -0.06891 | 0.00146  | 0.2594 |
| 326: | 40 | 14 | 26 | 0 | 40 | 39 | 13 | 27 | 0 | 39 | 580702.807 | 0.040 | 0.06350  | 0.00762  | 0.2463 |
| 327: | 40 | 14 | 26 | 0 | 41 | 39 | 13 | 27 | 0 | 40 | 580702.807 | 0.040 | 0.05086  | 0.00762  | 0.2530 |
| 328: | 40 | 14 | 26 | 0 | 39 | 39 | 13 | 27 | 0 | 38 | 580702.807 | 0.040 | -0.02377 | 0.00762  | 0.2409 |
| 329: | 40 | 14 | 26 | 0 | 42 | 39 | 13 | 27 | 0 | 41 | 580702.807 | 0.040 | -0.05836 | 0.00762  | 0.2598 |

|    |           |            | value of parameter (estimated uncertainty) |
|----|-----------|------------|--------------------------------------------|
| 1  | 10000     | A(35)      | 13748.29431 ( 44)                          |
| 2  | 20000     | B(35)      | 4611.754198 (168)                          |
| 3  | 30000     | C(35)      | 3448.600397 (142)                          |
| 4  | 10011     | A(37)      | 13653.57907 ( 76)                          |
| 5  | 20011     | B(37)      | 4611.903232 (299)                          |
| 6  | 30011     | C(37)      | 3442.691414 (290)                          |
| 7  | 200       | -DelJ(35)  | -1.086501 (120)E-03                        |
| 8  | 211       | -DelJ(37)  | -1.082635 (261)E-03                        |
| 9  | 1100      | -DelJK(35) | -9.96866 ( 61)E-03                         |
| 10 | 1111      | -DelJK(37) | -9.81886 (121)E-03                         |
| 11 | 2000      | -DelK(35)  | -0.0242119 ( 33)                           |
| 12 | 2011      | -DelK(37)  | -0.0230117 ( 88)                           |
| 13 | 40100     | -delJ(35)  | -0.231501 ( 41)E-03                        |
| 14 | 40111     | -delJ(37)  | -0.233362 ( 44)E-03                        |
| 15 | 41000     | -delK(35)  | -5.68744 ( 90)E-03                         |
| 16 | 41011     | -delK(37)  | -5.66112 (135)E-03                         |
| 17 | 399       | PhiJ(all)  | 0.0908 (263)E-09                           |
| 18 | 1299      | PhiJK(all) | 0.01327 (157)E-06                          |
| 19 | 2199      | PhiKJ(all) | -0.1087 ( 52)E-06                          |
| 20 | 3000      | PhiK(35)   | 0.0976 ( 34)E-06                           |
| 21 | 40299     | phiJ(all)  | -0.0333 (108)E-09                          |
| 22 | 41199     | phiJK(all) | 0.01002 ( 92)E-06                          |
| 23 | 42099     | phiK(all)  | 0.1292 (188)E-06                           |
| 24 | 110010000 | Xaa(35)    | -82.0281 ( 90)                             |
| 25 | 110020000 | Xbb(35)    | -65.3590 (101)                             |
| 26 | 110010011 | Xaa(37)    | -64.6464 (119)                             |
| 27 | 110020011 | Xbb(37)    | -51.5264 (102)                             |
| 28 | 10010000  | Caa(35)    | 0.01803 (152)                              |
| 29 | 10020000  | Cbb(35)    | 3.32 ( 58)E-03                             |
| 30 | 10030000  | Ccc(35)    | 1.98 ( 60)E-03                             |

MICROWAVE AVG = 0.002812 MHz,  
MICROWAVE RMS = 0.028484 MHz,  
END OF ITERATION 1 OLD, NEW RMS ERROR= 0.58882  
ClF3

Mon Jan 08 14:56:57 2001
