# Supplementary material for: The rotational spectrum of chlorine trifluoride, ClF3. Centrifugal distortion analysis, Cl nuclear magnetic shielding tensor, structure, and the harmonic force field
Source: Royal Society of Chemistry journal article supplement (doi:10.1039/b100527h), 2001-01-01
Supplement: clf3_force_field.pdf [file clf3_force_field.pdf]

OTHE MOLECULE IS A PROLATE ROTOR KAPPA = -.7743778 AND THE FOLLOWING TRANSFORMATIONS ARE VALID : A = Z B = X C = Y

HOWARD WILSON PARAMETERS  
 0 DJ = .103097E-02 DJK = .103079E-01 DK = .238698E-01 R5 = -.187912E-02 R6 = -.276995E-04  
 OWATSON'S FIRST ORDER CENTRIFUGAL DISTORTION CONSTANTS  
 0 DJ = -.213370E-02 DJK = -.758252E-01 DK = -.163608E+00 DEJ = .795539E-06 DEK = .192840E-04  
 OCENTRIFUGAL DISTORTION CONSTANTS VIA REDUCED HAMILTON  
 0 DELJ = .108637E-02 DELJK = .997555E-02 DELK = .241468E-01 DELTAJ = .231506E-03 DELTAK = .561175E-02

OCENTRIFUGAL DISTORTION CORRECTED ROTATIONAL CONSTANTS : 13783.93611 4629.65433 3465.66085  
 0 NO. FREQUENCY PARAMETER CLASSICAL VALUE FREQUENCY IN CM-1  
 1 .000000 .000000 761.820  
 2 .031515 .000000 534.897  
 3 .051394 .000000 328.006  
 4 .050793 .000000 331.886  
 5 .023621 .000000 713.669  
 6 .038662 .000000 436.019

OU VALUES CALCULATED FOR TEMP = .0 DEGREES KELVIN

| 0 | NO. | ATOMS | DISTANCE | U-VALUE | K-VALUE | U**2/R-K |
|---|-----|-------|----------|---------|---------|----------|
|   | 1   | 2     | 1.596700 | .042695 | .000867 | .000275  |
|   | 2   | 3     | 1.696640 | .046079 | .001627 | -.000376 |
|   | 3   | 1 3   | 2.277486 | .063015 | .000736 | .001007  |
|   | 4   | 3 4   | 3.389918 | .057551 | .000150 | .000827  |

OU VALUES CALCULATED FOR TEMP = 300.0 DEGREES KELVIN

| 0 | NO. | ATOMS | DISTANCE | U-VALUE | K-VALUE | U**2/R-K |
|---|-----|-------|----------|---------|---------|----------|
|   | 1   | 2     | 1.596700 | .043934 | .001124 | .000085  |
|   | 2   | 3     | 1.696640 | .048469 | .002416 | -.001031 |
|   | 3   | 1 3   | 2.277486 | .072509 | .001009 | .001300  |
|   | 4   | 3 4   | 3.389918 | .062273 | .000192 | .000952  |

OMATRIX OF THE A COMPONENT OF ZETA

|        |      |        |        |       |       |       |
|--------|------|--------|--------|-------|-------|-------|
| 761.82 | 1/CM | .0000  | .0000  | .0000 | .0000 | .0000 |
| 534.90 | 1/CM | .0000  | .0000  | .0000 | .0000 | .0000 |
| 328.01 | 1/CM | .0000  | .0000  | .0000 | .0000 | .0000 |
| 331.89 | 1/CM | -.4155 | -.0257 | .9092 | .0000 | .0000 |
| 713.67 | 1/CM | .0000  | .0000  | .0000 | .0000 | .0000 |
| 436.02 | 1/CM | .0000  | .0000  | .0000 | .0000 | .0000 |

OMATRIX OF THE B COMPONENT OF ZETA

|        |      |       |       |       |       |        |
|--------|------|-------|-------|-------|-------|--------|
| 761.82 | 1/CM | .0000 | .0000 | .0000 | .0000 | .0000  |
| 534.90 | 1/CM | .0000 | .0000 | .0000 | .0000 | .0000  |
| 328.01 | 1/CM | .0000 | .0000 | .0000 | .0000 | .0000  |
| 331.89 | 1/CM | .0000 | .0000 | .0000 | .9903 | -.1392 |
| 713.67 | 1/CM | .0000 | .0000 | .0000 | .0000 | .0000  |
| 436.02 | 1/CM | .0000 | .0000 | .0000 | .0000 | .0000  |

OMATRIX OF THE C COMPONENT OF ZETA

|        |      |       |        |        |        |        |
|--------|------|-------|--------|--------|--------|--------|
| 761.82 | 1/CM | .0000 | .0000  | .0000  | -.5070 | -.6221 |
| 534.90 | 1/CM | .0000 | .0000  | .0000  | .0670  | .6616  |
| 328.01 | 1/CM | .0000 | .0000  | .0000  | .8593  | -.4186 |
| 331.89 | 1/CM | .0000 | .0000  | .0000  | .0000  | .0000  |
| 713.67 | 1/CM | .5070 | -.0670 | -.8593 | .0000  | .0000  |
| 436.02 | 1/CM | .6221 | -.6616 | .4186  | .0000  | .0000  |

```

OINERTIAL DEFECT      DELTA (CENT) = .914012E-03
ODELTA (VIB) = .199842 V = 0 0 0 0 0 0
ODELTA (VIB) = -13.869901 V = 0 0 1 0 0 0
ODELTA (VIB) = 14.308976 V = 0 0 0 1 0 0
ODELTA (VIB) = .718962 V = 0 0 0 0 1 0
ODELTA (VIB) = -.016025 V = 0 1 0 0 0 0
ODELTA (VIB) = .609305 V = 0 0 0 0 1 0
ODELTA (VIB) = -.152583 V = 1 0 0 0 0 0

OCORRECTIONS OF THE MOMENTS OF INERTIA - ACCORDING TO: AA, AB, BB, AC, BC, CC
-.136002 -.007827 14.315779 -14.331521 -.000690 -.057194
.000000 .000000 -.000013 .000013 .000000 .000000
-.003923 -.181369 -.003483 .222384 -.192168 -.183033
.000000 .000000 .000000 .000000 .000000 .000000
.000000 .000000 .000000 .000000 .000000 .000000
-.492350 -.405064 .242550 .000000 .216605 .278893

OSUM OF THE CORRECTIONS FOR THE GROUND STATE : -.108728 .000000 -.170796 .000000 .000000 -.079683

OCOORDINATES IN CENTER OF MASS SYSTEM FOR ISOTOPE 2
O
I MASS X Y Z
1 18.998405 .000000 .000000 -1.243326
2 36.965898 .000000 .000000 .353374
3 18.998405 .000000 1.694959 .277876
4 18.998405 .000000 -1.694959 .277876

OFREQUENCIES IN CM-1 : 754.215 534.855 325.744 327.414 703.063 435.503
OMOMENTS OF INERTIA : 36.91884 109.16050 146.07935
OTRANSFORMATION MATRIX :
A .00000000E+00 .10000000E+01 .00000000E+00 Z INPUT SYSTEM
B .00000000E+00 .00000000E+00 .10000000E+01
C .10000000E+01 .00000000E+00 .00000000E+00

OTAU VALUES : TAAA = -.135445E+00 TBBB = -.619747E-02 TCCC = -.246357E-02
TAAB = .301688E-03 TABB = -.203455E-01 TAAC = -.848285E-02
TAC = -.793484E-32 TBCC = -.344146E-02 TBCB = -.113627E-16
ISOTOPE 2
OROTATIONAL CONSTANTS : 13688.80984 4629.65067 3459.59245
OTHE MOLECULE IS A PROLATE ROTOR KAPPA = -.7712321 AND THE FOLLOWING TRANSFORMATIONS ARE VALID : A = Z B = X C = Y
OHOWARD WILSON PARAMETERS
O DJ = .102706E-02 DJK = .101639E-01 DK = .226703E-01 R5 = -.187747E-02 R6 = -.277831E-04
OWATSON'S FIRST ORDER CENTRIFUGAL DISTORTION CONSTANTS
O DJ = -.214417E-02 DJK = -.751150E-01 DK = -.161254E+00 DEJ = .797801E-06 DEK = .190998E-04
OCENTRIFUGAL DISTORTION CONSTANTS VIA REDUCED HAMILTON
ODELJ = .108263E-02 DELJK = .983053E-02 DELK = .229482E-01 DELTAJ = .233368E-03 DELTAK = .558696E-02
OCENTRIFUGAL DISTORTION CORRECTED ROTATIONAL CONSTANTS : 13688.79967 4629.64050 3459.60771
O
NO. FREQUENCY PARAMETER CLASSICAL VALUE FREQUENCY IN CM-1
1 .022351 .000000 754.215
2 .031518 .000000 534.855
3 .051751 .000000 325.744
4 .051487 .000000 327.414
5 .023977 .000000 703.063
6 .038708 .000000 435.503

```

OU VALUES CALCULATED FOR TEMP = .0 DEGREES KELVIN

| 0 | NO. | ATOMS | DISTANCE | U-VALUE | K-VALUE | U**2/R-K |
|---|-----|-------|----------|---------|---------|----------|
|   | 1   | 2     | 1.596700 | .042495 | .000844 | .000287  |
|   | 2   | 3     | 1.696640 | .045881 | .001607 | -.000366 |
|   | 3   | 1 3   | 2.277486 | .062997 | .000744 | .000999  |
|   | 4   | 3 4   | 3.389918 | .057550 | .000151 | .000826  |

OU VALUES CALCULATED FOR TEMP = 300.0 DEGREES KELVIN

| 0 | NO. | ATOMS | DISTANCE | U-VALUE | K-VALUE | U**2/R-K |
|---|-----|-------|----------|---------|---------|----------|
|   | 1   | 2     | 1.596700 | .043768 | .001096 | .000103  |
|   | 2   | 3     | 1.696640 | .048313 | .002404 | -.001028 |
|   | 3   | 1 3   | 2.277486 | .072508 | .001023 | .001286  |
|   | 4   | 3 4   | 3.389918 | .062273 | .000193 | .000951  |

OMATRIX OF THE A COMPONENT OF ZETA

|        |      |       |       |       |        |       |       |
|--------|------|-------|-------|-------|--------|-------|-------|
| 754.21 | 1/CM | .0000 | .0000 | .0000 | -.3983 | .0000 | .0000 |
| 534.86 | 1/CM | .0000 | .0000 | .0000 | -.0275 | .0000 | .0000 |
| 325.74 | 1/CM | .0000 | .0000 | .0000 | -.9168 | .0000 | .0000 |
| 327.41 | 1/CM | .3983 | .0275 | .9168 | .0000  | .0000 | .0000 |
| 703.06 | 1/CM | .0000 | .0000 | .0000 | .0000  | .0000 | .0000 |
| 435.50 | 1/CM | .0000 | .0000 | .0000 | .0000  | .0000 | .0000 |

OMATRIX OF THE B COMPONENT OF ZETA

|        |      |       |       |       |        |        |       |
|--------|------|-------|-------|-------|--------|--------|-------|
| 754.21 | 1/CM | .0000 | .0000 | .0000 | .0000  | .0000  | .0000 |
| 534.86 | 1/CM | .0000 | .0000 | .0000 | .0000  | .0000  | .0000 |
| 325.74 | 1/CM | .0000 | .0000 | .0000 | .0000  | .0000  | .0000 |
| 327.41 | 1/CM | .0000 | .0000 | .0000 | .0000  | -.9907 | .1358 |
| 703.06 | 1/CM | .0000 | .0000 | .0000 | .9907  | .0000  | .0000 |
| 435.50 | 1/CM | .0000 | .0000 | .0000 | -.1358 | .0000  | .0000 |

OMATRIX OF THE C COMPONENT OF ZETA

|        |      |       |        |        |       |        |        |
|--------|------|-------|--------|--------|-------|--------|--------|
| 754.21 | 1/CM | .0000 | .0000  | .0000  | .0000 | -.4883 | -.6294 |
| 534.86 | 1/CM | .0000 | .0000  | .0000  | .0000 | .0634  | .6653  |
| 325.74 | 1/CM | .0000 | .0000  | .0000  | .0000 | -.8704 | .4016  |
| 327.41 | 1/CM | .0000 | .0000  | .0000  | .0000 | .0000  | .0000  |
| 703.06 | 1/CM | .4883 | -.0634 | .8704  | .0000 | .0000  | .0000  |
| 435.50 | 1/CM | .6294 | -.6653 | -.4016 | .0000 | .0000  | .0000  |

0INERTIAL DEFECT DELTA (CENT) = .911602E-03

|                 |            |     |   |   |   |   |   |
|-----------------|------------|-----|---|---|---|---|---|
| O DELTA (VIB) = | 199915     | V = | 0 | 0 | 0 | 0 | 0 |
| O DELTA (VIB) = | -33.443929 | V = | 0 | 0 | 1 | 0 | 0 |
| O DELTA (VIB) = | 33.877071  | V = | 0 | 0 | 0 | 1 | 0 |
| O DELTA (VIB) = | .734634    | V = | 0 | 0 | 0 | 0 | 1 |
| O DELTA (VIB) = | -.017113   | V = | 0 | 1 | 0 | 0 | 0 |
| O DELTA (VIB) = | .560319    | V = | 0 | 0 | 0 | 0 | 1 |
| O DELTA (VIB) = | -.111659   | V = | 1 | 0 | 0 | 0 | 0 |

OCORRECTIONS OF THE MOMENTS OF INERTIA - ACCORDING TO: AA, AB, BB, AC, BC, CC

|          |          |           |            |          |          |
|----------|----------|-----------|------------|----------|----------|
| -.136552 | -.008069 | 33.887729 | -33.901977 | -.000671 | -.057614 |
| .000000  | .000000  | .000000   | .000000    | .000000  | .000000  |
| -.004142 | -.181152 | -.003471  | .224813    | -.195333 | -.182060 |
| .000000  | .000000  | .000000   | .000000    | .000000  | .000000  |
| .000000  | .000000  | .000000   | .000000    | .000000  | .000000  |
| -.452268 | -.406250 | .240404   | .000000    | .164401  | .295045  |

OSUM OF THE CORRECTIONS FOR THE GROUND STATE : -.108577 .000000 .000000 .000000 .000000 -.079334

| 1     | NUMBER OF PARAMETERS= 10 | NUMBER OF DATA BLOCKS = 2       | NUMBER OF DATA PER BLOCK 11 | 11              |
|-------|--------------------------|---------------------------------|-----------------------------|-----------------|
| 0 NR. | MEASURED                 | SCALING OF DATA PER BLOCK 1.000 | WEIGHT                      | 1.000           |
|       | ONUMBER HELD FIXED = 0   | CALC - OBS                      |                             |                 |
|       | FREQUENCIES              | CALCTD.                         |                             |                 |
| 1     | .7619000000E+03          | .7618197716E+03                 | -.8023835455E-01            | .1000000000E+01 |
| 2     | .5362000000E+03          | .5348970187E+03                 | -.1302981304E+01            | .1000000000E+01 |
| 3     | .3280000000E+03          | .3280055239E+03                 | .523890844E-02              | .1000000000E+01 |
| 4     | .3320000000E+03          | .3318861323E+03                 | -.1138676980E+00            | .1000000000E+01 |
| 5     | .7131000000E+03          | .7136694067E+03                 | .5694066604E+00             | .1000000000E+01 |
| 6     | .4360000000E+03          | .4360189689E+03                 | -.5981031055E+01            | .1000000000E+01 |
| 7     | .1086501000E+01          | .1086365484E+01                 | -.1355164088E-03            | .6944444444E+04 |
| 8     | .9968660000E+01          | .9975545869E+01                 | .6885868771E-02             | .2687449610E+03 |
| 9     | .2421190000E+02          | .2414680247E+02                 | -.6509753185E-01            | .9182736455E+01 |
| 10    | .2315010000E+00          | .2315056153E+00                 | .4615336548E-05             | .5948839976E+05 |
| 11    | .5687440000E+01          | .5611745870E+01                 | -.7569412955E-01            | .1234567901E+03 |
| 12    | -.7600000000E+01         | -.7604947810E+01                | -.4947809854E-02            | .2500000000E+02 |
| 13    | -.9180000000E-01         | -.4197401739E-01                | .4982598261E-01             | .1020304051E-03 |
| 14    | -.2086600000E+01         | -.2261565434E+01                | -.1749654343E+00            | .1020304051E-03 |
| 15    | -.4410000000E+01         | -.4471821974E+01                | .6182197441E-01             | .1020304051E-03 |
| 16    | -.1067000000E+02         | -.1060596586E+02                | .6403413537E-01             | .2500000000E+02 |
| 17    | -.4428000000E+00         | -.5156168608E+00                | -.72816866075E-01           | .1020304051E-03 |
| 18    | .1082635000E+01          | .1082630489E+01                 | -.45111069669E-05           | .1467976101E+04 |
| 19    | .9818860000E+01          | .9830529499E+01                 | .1166949912E-01             | .6830134554E+02 |
| 20    | .2301170000E+02          | .2294815524E+02                 | -.6354476130E-01            | .1291322314E+01 |
| 21    | .2333620000E+00          | .2333684641E+00                 | .6464145860E-05             | .5165289256E+05 |
| 22    | .5661120000E+01          | .5586963611E+01                 | -.7415638936E-01            | .5486968450E+02 |

DERIVATIVES OF THE MEASURED DATA WITH RESPECT TO THE PARAMETERS

|    |            |            |            |            |            |            |            |            |            |
|----|------------|------------|------------|------------|------------|------------|------------|------------|------------|
| 1  | .8763E+02  | .2380E+01  | .8864E+01  | .0000E+00  | .4089E+02  | -.7881E+02 | .2380E+01  | -.9182E+01 | .8864E+01  |
| 2  | .3976E+01  | .8010E+02  | .1388E-01  | .0000E+00  | -.5056E+02 | -.6628E+00 | .8010E+02  | .2128E+01  | .1388E-01  |
| 3  | .1570E+00  | .3293E+00  | .7800E+02  | .1137E-09  | .6431E+00  | .9854E+01  | .3293E+00  | .1010E+02  | .7800E+02  |
| 4  | .5684E-10  | .0000E+00  | .5684E-10  | .2273E+05  | .1137E-09  | .1137E-09  | .1137E-09  | .5684E-10  | .0000E+00  |
| 5  | .6821E-09  | .1297E+03  | .1822E+02  | .0000E+00  | -.2046E-08 | -.4547E-09 | -.1297E+03 | .9724E+02  | -.1821E+02 |
| 6  | .0000E+00  | .1300E+01  | .1262E+03  | .0000E+00  | -.5684E-10 | .1705E-09  | -.1302E+01 | .2556E+02  | -.1263E+03 |
| 7  | -.7466E-02 | -.3057E+00 | -.3294E-01 | -.2220E-11 | .1513E-01  | -.1143E+01 | .3057E+00  | -.1738E+00 | -.3294E-01 |
| 8  | -.3786E-01 | .8620E+00  | .6911E+01  | -.3553E-11 | .3405E+01  | -.1299E+02 | .8620E+00  | -.1609E+01 | .5456E+01  |
| 9  | -.4818E+01 | -.5947E+00 | .1797E+01  | -.2487E-10 | .4616E+01  | -.1299E+02 | -.6079E+00 | .2674E+01  | -.1057E+02 |
| 10 | .1297E-02  | -.8336E-01 | .7445E-02  | .4996E-12  | .6042E-01  | .2215E-01  | -.8336E-01 | .5374E-02  | .7445E-02  |
| 11 | .6526E-01  | -.3029E+00 | .3031E+01  | .4441E-11  | .5859E-01  | .2126E+00  | -.2963E+00 | .6541E-01  | .3152E+01  |
| 12 | -.8925E+00 | .8163E-01  | .7775E+00  | -.1137E-09 | .4834E+00  | .3921E+01  | .8163E-01  | .2628E+00  | -.7775E+00 |
| 13 | .7998E-01  | -.8281E-01 | -.2266E-02 | .1137E-09  | -.4803E+00 | .5061E-01  | -.8281E-01 | -.1810E+00 | -.2266E-02 |
| 14 | -.4234E-01 | -.1190E-02 | .2388E+00  | .0000E+00  | .9452E-01  | -.1453E+01 | -.1190E-02 | .3344E-01  | -.2388E+00 |
| 15 | .5684E-10  | .5684E-10  | .5684E-10  | -.3062E+03 | -.5684E-10 | -.1137E-09 | .5684E-10  | .0000E+00  | -.1137E-09 |
| 16 | -.7958E-09 | -.1663E+01 | .1265E+01  | -.1137E-09 | .2160E-08  | .3411E-09  | .1663E+01  | .4036E+01  | .1265E+01  |
| 17 | .5684E-10  | -.1650E+00 | .4666E+00  | .5684E-10  | .5684E-10  | -.1137E-09 | .1652E+00  | .1635E+01  | -.4662E+00 |
| 18 | -.7579E-02 | -.3051E+00 | .3171E-01  | .4441E-12  | .1476E-01  | -.1727E-01 | -.3051E+00 | -.1713E+00 | -.3171E-01 |
| 19 | -.3969E-01 | .8644E+00  | .6847E+01  | -.7105E-11 | -.3389E+01 | -.1123E+01 | .8733E+00  | -.1567E+01 | .5488E+01  |
| 20 | -.4784E+01 | -.5982E+00 | .2214E+01  | .3553E-11  | .4604E+01  | -.1229E+02 | -.6071E+00 | .2592E+01  | -.1012E+02 |
| 21 | .1354E-02  | -.8365E-01 | .6828E-02  | .0000E+00  | .6060E-01  | .2191E-01  | -.8365E-01 | -.6605E-02 | .6828E-02  |
| 22 | .6601E-01  | -.2992E+00 | -.3029E+01 | .2665E-11  | .5529E-01  | .2049E+00  | -.2948E+00 | -.3021E+00 | .3138E+01  |
